# Supplementary material for: Volatile emission and biosynthesis in endophytic fungi colonizing black poplar leaves
Source: publisher site journal article supplement (doi:10.3762/bjoc.17.118), 2021-07-22
Supplement: Additional file 1 [file 1860-5397-17-118-S1.pdf]

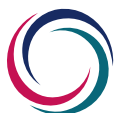

## Supporting Information

for

### **Volatile emission and biosynthesis in endophytic fungi colonizing black poplar leaves**

Christin Walther, Pamela Baumann, Katrin Luck, Beate Rothe, Peter H. W. Biedermann, Jonathan Gershenzon, Tobias G. Köllner and Sybille B. Unsicker

*Beilstein J. Org. Chem.* **2021**, *17*, 1698–1711. [doi:10.3762/bjoc.17.118](https://doi.org/10.3762/bjoc.17.118)

**Sequences of isolated endophytic fungi and identification according to NCBI database, primer used in this study, representative total ion chromatograms of single endophytic volatile blend, mass spectra of unknown volatile organic compounds, and BUSCO analysis of *Cladosporium* sp. de novo assembly**

## Contents

**Table S1:** Sequences of isolated endophytic fungi and identification according to NCBI database

**Table S2:** Primer used in this study

**Table S3:** Numbers for volatile organic compounds shown on total ion chromatograms in Figure S1

**Figure S1:** Representative total ion chromatograms of the volatiles measured from endophytes in this study.

**Figure S2:** Mass spectra of unknown volatile organic compounds

**Figure S3:** BUSCO analysis of *Cladosporium* sp. de novo assembly

**Table S1:** Endophytes were identified to genus level via sequencing of ribosomal DNA (ITS1F/ ITS4). The obtained sequences were compared to the NCBI sequence database and the identity (%) of best hits with their accession number is given in the main document.

| <b>Species</b>               | <b>Sequence</b>                                                                                                                                                                                                                                                                                                                                                                                                                                                                                                                                           |
|------------------------------|-----------------------------------------------------------------------------------------------------------------------------------------------------------------------------------------------------------------------------------------------------------------------------------------------------------------------------------------------------------------------------------------------------------------------------------------------------------------------------------------------------------------------------------------------------------|
| <i>Alternaria infectoria</i> | TGCTTTTTCGCTACTTCTTGTTTCTGGGTGGGCTCGCCCGCCCTCAGGACCAAC<br>CACAAACCTTTTGCAATAGCAATCAGCGTCAGTAACAACGTAATTAATTACAACCTT<br>TCAACAACGGATCTCTTGGTTCTGGCATCGATGAAGAACGCAGCGAAATGCGATA<br>CGTAGTGTGAATTGCAGAATTCAGTGAATCATCGAATCTTTGAACGCACATTGCG<br>CCCTTTGGTATTCCAAAGGGCATGCCTGTTTCGAGCGTCATTTGTACCCTCAAGCT<br>TTGCTTGGTGTGGGCGTCTTTTGTCTCCAGTTCGCTGGAGACTCGCCTTAAAGT<br>CATTGGCAGCCGGCCTACTGGTTTCGGAGCGCAGCACAAGTCGCGCTCTTCGCC<br>AGCCAAGGTCAGCGTCCAGCAAGCCTTTTTTTCAACCTTTGACCTCGGATCAGGT<br>AGGGATACCCG                                                       |
| <i>Alternaria</i> sp. 1      | TTCTTGTTTCTTGGTGGGTTTCGCCACCACTAGGACAAACATAAACCTTTTGTA<br>TTGCAATCAGTGTGAGTAACAATAATAATTACAACCTTTCAACAACGGATCTCTT<br>GGTTCTGGCATCGATGAAGAACGCAGCGAAATGCGATAAGTAGTGTGAATTGCA<br>GAATTCAGTGAATCATCGAATCTTTGAACGCACATTGCGCCCTTTGGTATTCCAAA<br>GGGCATGCCTGTTTCGAGCGTCATTTGTACCCTCAAGCTTTGCTTGGTGTGGGC<br>GTCTTGTCTCTAGCTTTGCTGGAGACTCGCCTTAAAGTAATTGGCAGCCGGCCTA<br>CTGGTTTCGGAGCGCAGCACAAGTCGCACTCTCTATCAGCAAAGGTCTAGCATC<br>CATTAAAGCCTTTTTTTCAACTTTTACCTCGGATCAGGTAGGGATACCCGCTGAAC<br>TTAAGCATATCAATAAGCGGAGGA                                            |
| <i>Stemphylium</i> sp.       | AAAAATGTGGTCTTGATGGATGCTCAACCAAGGCCGATTCAAAGTGCAAGAATTG<br>TGCTGCGCTCCGAAACCAGTAGGTGGGCTGCCAATCATTTTAAGGCGAGTCTCG<br>TGAGAGACAAAGACGCCAACACCAAGCAAAGCTTGAGGGTACAAATGACGCTC<br>GAACAGGCATGCCCTTTGGAATACCAAGGGCGCAATGTGCGTTCAAAGATTG<br>ATGATTCACTGAATTCTGCAATTCACACTACGTATCGCATTTCGCTGCGTTCTTCA<br>TCGATGCCAGAACCAAGAGATCCGTTGTTGAAAGTTGTAATAATTACATTGTTTAC<br>TGACGCTGATTGCAATTACAAAAAGGTTTATGGTTTGGTCTGGTGGCGGGCGAA<br>CCCGCCAGGAAACAAGAAGTGCGCAAAAGACATGGGTGAATAATTAGACAAG<br>CTGGAGCCCTCACCGAGGTGAGGTCCCAACCCGCTTTCATATTGTGAATGATCC<br>CTCCGCAGGTTACCC |
| <i>Aureobasidium</i> sp. 1   | GTCCCAGGCGAGCGCCCGCCAGAGTTAAACCAAACCTCTTGTTATTTAACCGGTC<br>GTCTGAGTTAAAAATTTGAATAAATCAAACTTTCAACAACGGATCTCTTGGTTCTC<br>GCATCGATGAAGAACGCAGCGAAATGCGATAAGTAATGTGAATTGCAGAATTCAG<br>TGAATCATCGAATCTTTGAACGCACATTGCGCCCTTGGTATTCCGAGGGGCATG<br>CCTGTTTCGAGCGTCATTACACCACTCAAGCTATGCTTGGTATTGGGCGTCTCCT<br>TAGTTGGGCGCGCCTTAAAGACCTCGGCGAGGCCACTCCGGCTTTAGGCGTAGT<br>AGAATTTATTGCAACGTCTGTCAAAGGAGAGGAACTCTGCCGACTGAAACCTTTA<br>TTTTCTAGGTTGACCTCGGATCAGGTAGGGATACCC                                                                                          |

| Species                    | Sequence                                                                                                                                                                                                                                                                                                                                                                                                                                                                                                                                                                                                                                                                                                                                                                                                         |
|----------------------------|------------------------------------------------------------------------------------------------------------------------------------------------------------------------------------------------------------------------------------------------------------------------------------------------------------------------------------------------------------------------------------------------------------------------------------------------------------------------------------------------------------------------------------------------------------------------------------------------------------------------------------------------------------------------------------------------------------------------------------------------------------------------------------------------------------------|
| <i>Aureobasidium</i> sp. 2 | ATAAAGGTTTCAGTCGGCAGAGTTCCTCTCCTTTGACAGACGTTTCAATAAATTCT<br>ACTACGCCTAAAGCCGGAGTGGCCTCGCCGAGGTCTTTAAGGCGCGCCAACTA<br>AGGACGACGCCCAATACCAAGCATAGCTTGAGTGGTGTAAATGACGCTCGAACAG<br>GCATGCCCTCGGAATACCAAGGGGCGCAATGTGCGTTCAAAGATTCGATGATT<br>CACTGAATTCTGCAATTCACATTACTTATCGCATTTCGCTGCGTTCTTCATCGATG<br>CGAGAACCAAGAGATCCGTTGTTGAAAGTTTTGATTATTCAAATTTAACTCAG<br>ACGACCGGTTAAATAACAAGAGTTTGGTTTAACTCTGGCGGGGCGCTCGCCTGGG<br>ACGAATCCCCAGCGGCTCGAGACCGAGCGGTCCC GCCAAAGCAACAAGGTAGTT<br>TTAACAACAAAGGGTTGGAGGTGGGCGCTGAGCACCTTACTCTTTAATGATCC<br>TTCCGCAGGTTACCTACCGAAGNGGATNATTAAGAGTAAGGGTGTCTGAGCGC<br>CCGACCTCCAACCTTTGTTGTTAAAACCTACCTTGTGCTTTGGCGGGACCGCTC<br>GGTCTCGAGCCGCTGGGATTCTCCAGGCGAGCGCCCGCCAGAGTTAAACCA<br>AACTCTTGTATTTAACC GGTCGTCTGAGTTAAAATTTNGAATAAATNAAAACCTTN<br>ACAACGGANCTCTTGGTTCTCGCATCGA |
| <i>Didymella glomerata</i> | CCGCCGATTGGNCAATTTAAACNATTTGCAGTTGCAATCAGCGTCTGAAAAAACT<br>TAATAGTTACAACCTTTCAACAACGGATCTCTTGGTTCTGGCATCGATGAAGAACGC<br>AGCGAAATGCGATAAGTAGTGTGAATTGCAGAATTCAGTGAATCATCGAATCTTT<br>GAACGCACATTGCGCCCCCTTGGTATTCCATGGGGCATGCCTGTTGAGCGTCAT<br>TTGTACCTTTCAAGCTCTGCTTGGTGTGGGTGTTTGTCTCGCCTCTGCGTGTAGA<br>CTCGCCTCAAACAATTGGCAGCCGGCGTATTGATTTGAGAGCGCAGTACATCTC<br>GCGCTTTGCACTCATAACGACGACGTCCAAAAGTACATTTTTACTCTTGACCTC<br>GGATCAGGTAGGGATACCCGCTGAACCTAAGCATATCAATAAGCGG                                                                                                                                                                                                                                                                                                                                       |
| <i>Didymella</i> sp. 1     | CCGCCGATTGGACAATTTAAACCATTTGCAGTTGCAATCAGCGTCTGAAAAAACTT<br>AATAGTTACAACCTTTCAACAACGGATCTCTTGGTTCTGGCATCGATGAAGAACGC<br>AGCGAAATGCGATAAGTAGTGTGAATTGCAGAATTCAGTGAATCATCGAATCTTT<br>GAACGCACATTGCGCCCCCTTGGTATTCCATGGGGCATGCCTGTTGAGCGTCAT<br>TTGTACCTTTCAAGCTCTGCTTGGTGTGGGTGTTTGTCTCGCCTCTGCGTGTAGA<br>CTCGCCTCAAACAATTGGCAGCCGGCGTATTGATTTGAGAGCGCAGTACATCTC<br>G                                                                                                                                                                                                                                                                                                                                                                                                                                              |
| <i>Didymella</i> sp. 2     | CTTTTAAGTACCTTACGTTTCCTCGGCGGGTCCGCCCGCGATTGGACAATTTAA<br>ACCATTTGCAGTTGCAATCAGCGTCTGAAAAAACTTAATAGTTACAACCTTTCAACA<br>ACGGATCTCTTGGTTCTGGCATCGATGAAGAACGCAGCGAAATGCGATAAGTAGT<br>GTGAATTGCAGAATTCAGTGAATCATCGAATCTTTGAACGCACATTCGACCCCTT<br>GGTATTCCATGGGGCATGCTGTTGAGCGTCATTTGTACCTTTCAAGCTCTGCTT<br>GGTGTGGGTGTTTGTCTCGCCTCTGCGTGTAGACTCGCCTCAAACAATTGGCA<br>GCCGGCGTATTGATTTGAGAGCGCAGTACATCTCGCGCTTTGCACTCATAACGAC<br>GACGTCCAAAAGTACATT                                                                                                                                                                                                                                                                                                                                                                    |
| <i>Cladosporium</i> sp.    | TCGGGCGGGGCTCCGGGTGGACACTTCAAACCTTTGCGTAACCTTTGCAGTCTG<br>AGTAAACTTAATTAATAAATTAACACTTTTAAACAACGGATCTCTTGGTTCTGGCATC<br>GATGAAGAACGCAGCGAAATGCGATAAGTAATGTGAATTGCAGAATTCAGTGAAT<br>CATCGAATCTTTGAACGCACATTGCGCCCCCTGGTATTCCGGGGGGCATGCCTG<br>TTCGAGCGTCATTTACCACTCAAGCCTCGCTTGGTATTGGGCAACCGG                                                                                                                                                                                                                                                                                                                                                                                                                                                                                                                    |
| <i>Fusarium</i> sp.        | GGGACGGCCCGCCGAGGAAACCCTAAACTCTGTTTTAGTGGAACTTCTGAGT<br>ATAAAAAACAAATAAATCAAACCTTTCAACAACGGATCTCTTGGTTCTGGCATCGA<br>TGAAGAACGCAGCAAATGCGATAAGTAATGTGAATTGCAGAATTCAGTGAATCA<br>TCGAATCTTTGAACGCACATTGCGCCCGCCAGTATTCTGGCGGGCATGCCTGTT<br>GAGCGTCATTTCAACCCTCAAGCCAGCTTGGTGTGGGATCTGTGTGAAACAC<br>AGTCCCCAAATTGATTGGCGGTACGTCGAGCTTCCATAGCGTAGTA                                                                                                                                                                                                                                                                                                                                                                                                                                                                   |
| <i>Sordaria</i> sp.        | CGGGCCCCGGATCCTCGGGTCTCCCGCTCGCGGGAGGCTGCCCGCCGGAGT<br>GCCGAAACCAAACCTTTGATATTTTATGTCTCTCTGAGTAAACTTTTAAATAAGTCA<br>AAACTTTCAACAACGGATCTCTTGGTTCTGGCATCGATGAAGAACGCAGCGAAAT<br>GCGATAAGTAATGTGAATTGCAGAATTCAGTGAATCATCGAATCTTTGAACGCACA<br>TTGCGCTCGCCAGTATTCTGGCGAGCATGCCTGTTGAGCGTCATTTCAACCATC<br>AAGCTCTGCTTGGGTTGGGATCCGCGTCTGACGCGGTCCCTCAAACAACAGTGG<br>CGGGCTCGTAGTCACACCGAGCGTAGTAACTCTACATCGCTATGGTCTGCGG<br>CGGGTTCTTGGCGTAAAACCCCAATTTCTAAGGTTGACCTCGGATCAGGTAGGA<br>ATACCCGCTGAACCTAAGCATATCAATAAGCGGAGGA                                                                                                                                                                                                                                                                                           |

| Species               | Sequence                                                                                                                                                                                                                                                                                                                                                                                                                                                                                                                                                       |
|-----------------------|----------------------------------------------------------------------------------------------------------------------------------------------------------------------------------------------------------------------------------------------------------------------------------------------------------------------------------------------------------------------------------------------------------------------------------------------------------------------------------------------------------------------------------------------------------------|
| <i>Arthrinium</i> sp. | AAAAATGTGGTCTTGATGGATGCTCAACCAAGGCCGATTCAAAGTGCAAGAATTG<br>TGCTGCGCTCCGAAACCAGTAGGTCGGCTGCCAATCATTTAAGGCCGAGTCTCG<br>TGAGAGACAAAGACGCCAACACCAAGCAAAGCTTGAGGGTACAAATGACGCTC<br>GAACAGGCATGCCCTTTGGAATACCAAAGGGCGCAATGTGCGTTCAAAGATTG<br>ATGATTCACTGAATTCTGCAATTCACACTACGTATCGCATTTTCGCTGCGTTCTTCA<br>TCGATGCCAGAACCAAGAGATCCGTTGTTGAAAGTTGAATAATTACATTGTTTAC<br>TGACGCTGATTGCAATTACAAAAGGTTTATGGTTTGGTCCCTGGTGGCGGGCGAA<br>CCCGCCAGGAAACAAGAAGTGCGCAAAAGACATGGGTGAATAATTCAGACAAG<br>CTGGAGCCCTCACCGAGGTGAGGTCCCAACCCGCTTTCATATTGTGTAATGATCC<br>CTCCGCAGGTTCCACC |

**Table S2:** Primers used in this study.

| Name       | Sequence                | Purpose                 |
|------------|-------------------------|-------------------------|
| CxTPS1_Fwd | CACCATGAGCTCTAGCACGGGTC | cloning                 |
| CxTPS1_Rev | TCACGACGCCCTCG          | cloning                 |
| CxTPS2_Fwd | CACCATGTGACACCCTACTCGCC | cloning                 |
| CxTPS2_Rev | TCAGCAAACTCCAGATAGCTAGG | cloning                 |
| ITS1F      | CTTGGTCATTTAGAGGAAGTAA  | amplify fungal rRNA ITS |
| ITS4       | TCCTCCGCTTATTGATATGC    | amplify fungal rRNA ITS |

**Table S3:** Numbers for volatile organic compounds, which are shown in the total ion chromatograms of the volatile bouquet for each endophytic fungus in Figure S1.

| #  | Volatile organic compound | R.T. (min) |
|----|---------------------------|------------|
| 1  | Ethanol                   | 1.525      |
| 2  | 2-Butanone                | 1.855      |
| 3  | Ethyl Acetate             | 1.940      |
| 4  | 2-Methyl-1-propanol       | 2.020      |
| 5  | unknown 1                 | 2.265      |
| 6  | 3-Hydroxy-2-Butanone      | 2.720      |
| 7  | 3-Methyl-1-butanol        | 3.035      |
| 8  | 2-Methyl-1-butanol        | 3.070      |
| 9  | unknown 2                 | 3.780      |
| 10 | 3-Methylbutyl acetate     | 6.100      |
| 11 | Ethenylbenzene            | 6.325      |
| 12 | unknown 3                 | 6.730      |
| 13 | unknown 4                 | 10.380     |
| 14 | unknown 5                 | 10.655     |
| 15 | 2-Phenylethanol           | 12.240     |
| 16 | unknown 6                 | 17.465     |
| 17 | unknown 7                 | 17.650     |
| 18 | $\alpha$ -Cubebene        | 17.920     |

|    |                                      |        |
|----|--------------------------------------|--------|
| 19 | unknown 8                            | 17.950 |
| 20 | unknown 9                            | 18.075 |
| 21 | unknown 10                           | 18.245 |
| 22 | unknown 11                           | 18.330 |
| 23 | $\alpha$ -Copaene                    | 18.525 |
| 24 | unknown 12                           | 18.765 |
| 25 | unknown 13                           | 18.850 |
| 26 | Sativene                             | 18.985 |
| 27 | $\alpha$ -Gurjunene                  | 19.280 |
| 28 | unknown 14                           | 19.300 |
| 29 | unknown 15                           | 19.380 |
| 30 | unknown 16                           | 19.400 |
| 31 | unknown 17                           | 19.460 |
| 32 | Aristolene                           | 19.485 |
| 33 | ( <i>E</i> )- $\beta$ -Caryophyllene | 19.500 |
| 34 | unknown 18                           | 19.535 |
| 35 | unknown 19                           | 19.675 |
| 36 | unknown 20                           | 19.695 |
| 37 | Bicyclossequiphellandrene            | 19.745 |
| 38 | $\beta$ -Gurjunene                   | 19.775 |
| 39 | unknown 21                           | 19.790 |
| 40 | unknown 22                           | 19.845 |
| 41 | unknown 23                           | 19.880 |
| 42 | $\alpha$ -Guaiene                    | 20.000 |
| 43 | unknown 24                           | 20.015 |
| 44 | unknown 25                           | 20.120 |
| 45 | unknown 26                           | 20.140 |
| 46 | ( <i>E</i> )- $\beta$ -Farnesene     | 20.195 |
| 47 | unknown 27                           | 20.325 |
| 48 | unknown 28                           | 20.440 |
| 49 | unknown 29                           | 20.490 |
| 50 | unknown 30                           | 20.555 |
| 51 | $\beta$ -Chamigrene                  | 20.585 |
| 52 | unknown 31                           | 20.610 |
| 53 | unknown 32                           | 20.610 |
| 54 | $\alpha$ -Selinene                   | 20.665 |
| 55 | $\gamma$ -Muurolene                  | 20.685 |
| 56 | unknown 33                           | 20.800 |
| 57 | unknown 34                           | 20.860 |
| 58 | $\beta$ -Selinene                    | 20.910 |
| 59 | unknown 35                           | 20.930 |
| 60 | (+)-Valencene                        | 21.040 |
| 61 | unknown 36                           | 21.115 |
| 62 | $\alpha$ -Muurolene                  | 21.170 |
| 63 | $\beta$ -Himachalene                 | 21.195 |
| 64 | $\beta$ -Bisabolene                  | 21.305 |
| 65 | unknown 37                           | 21.630 |

|    |            |        |
|----|------------|--------|
| 66 | unknown 38 | 21.635 |
| 67 | unknown 39 | 21.775 |
| 68 | unknown 40 | 21.985 |
| 69 | unknown 41 | 22.075 |
| 70 | unknown 42 | 22.150 |
| 71 | unknown 43 | 22.355 |
| 72 | unknown 44 | 22.720 |
| 73 | unknown 45 | 23.235 |
| 74 | unknown 46 | 23.875 |
| 75 | unknown 47 | 24.485 |
| 76 | unknown 48 | 24.675 |
| 77 | unknown 49 | 25.980 |

---

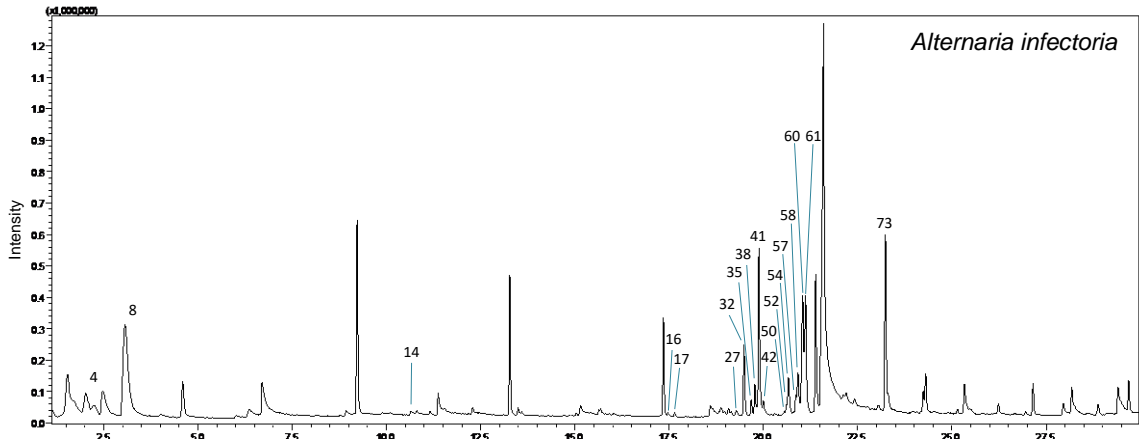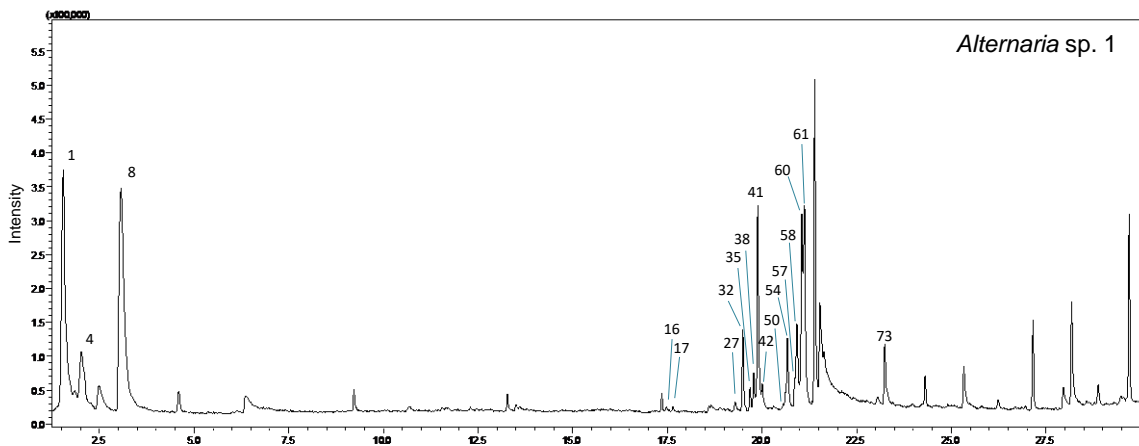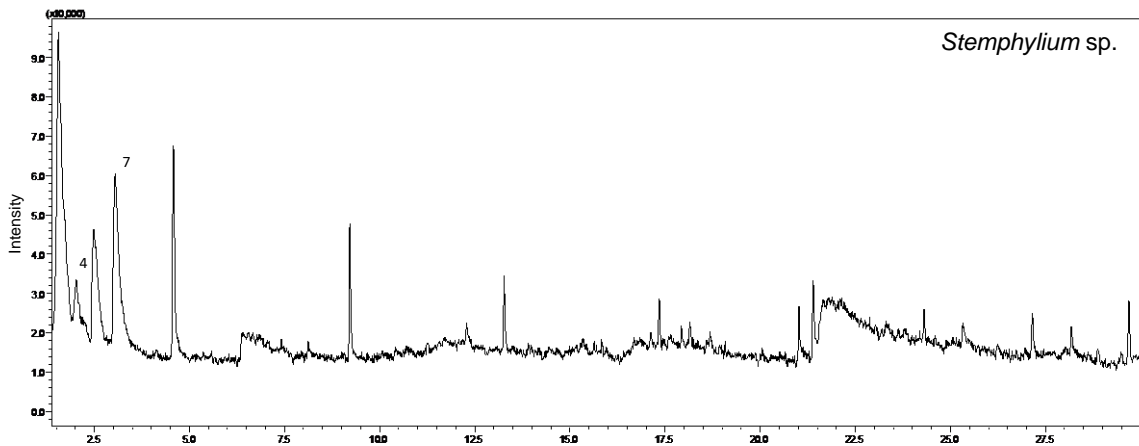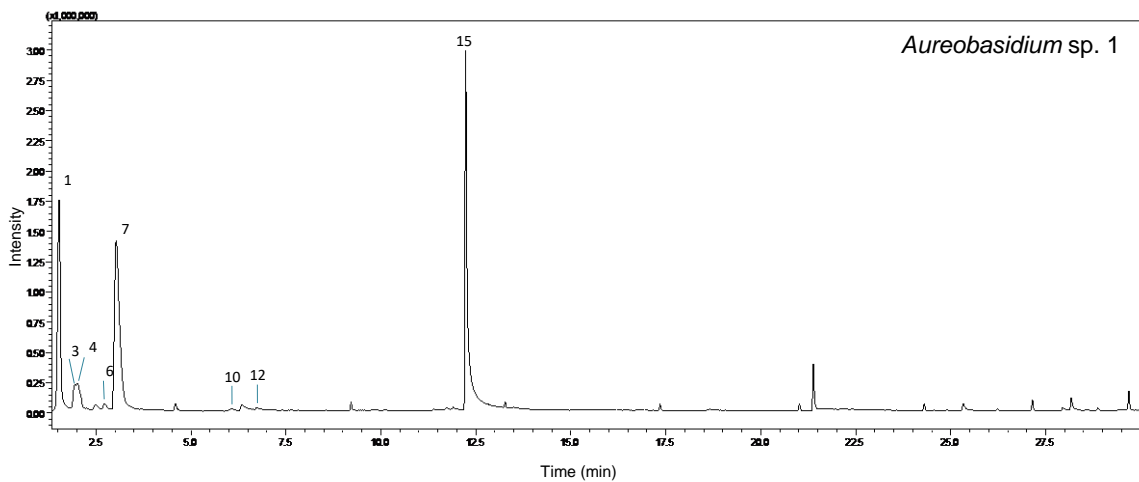



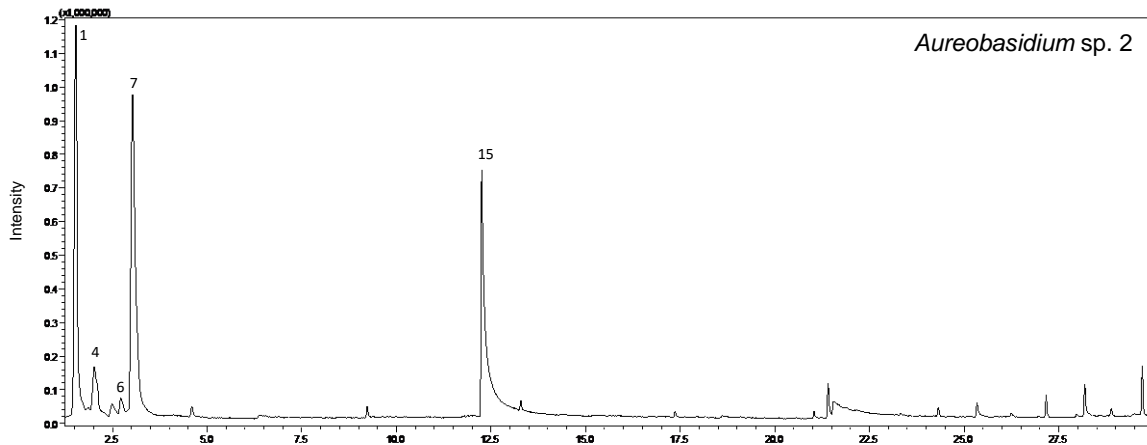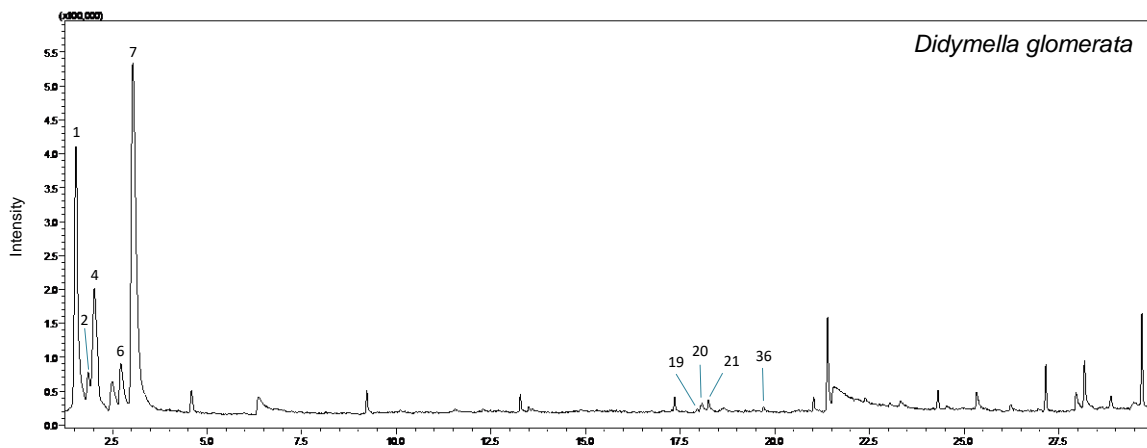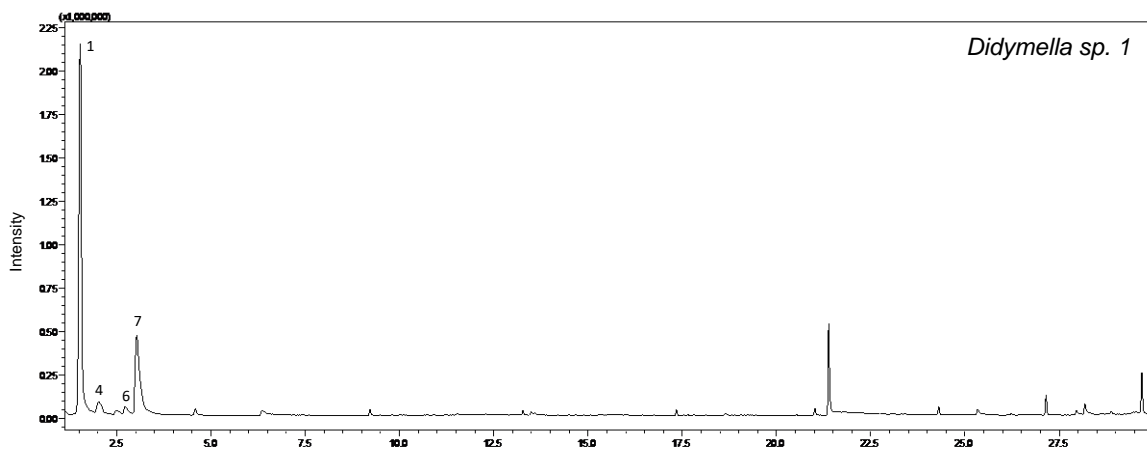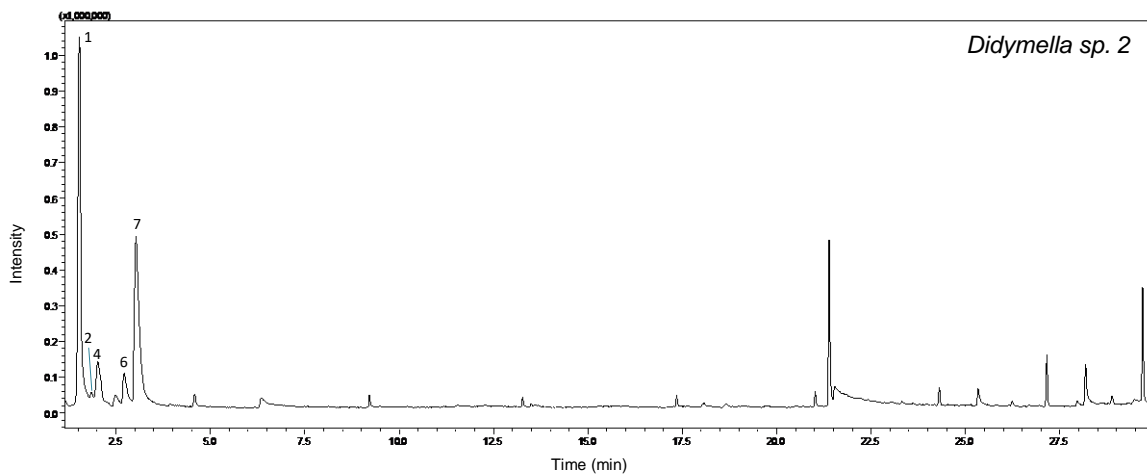

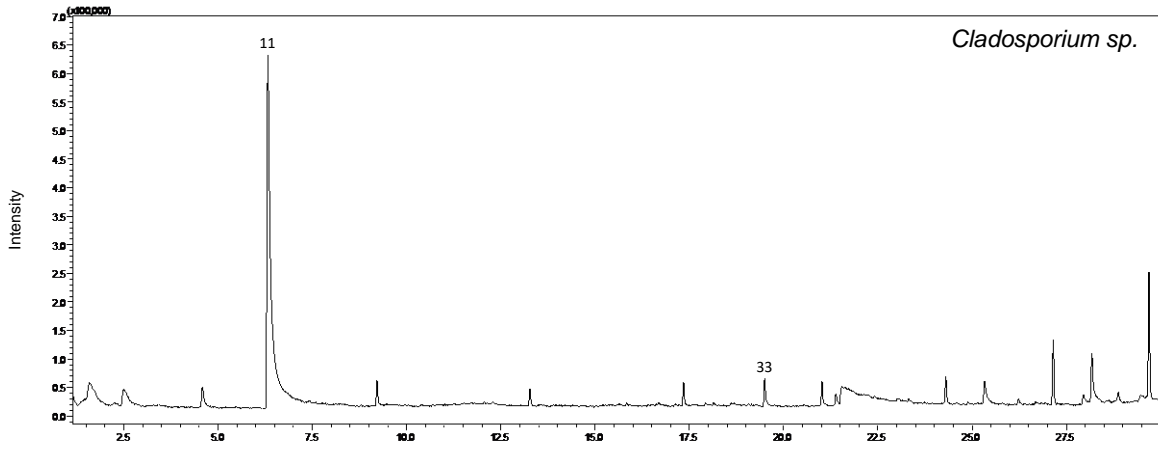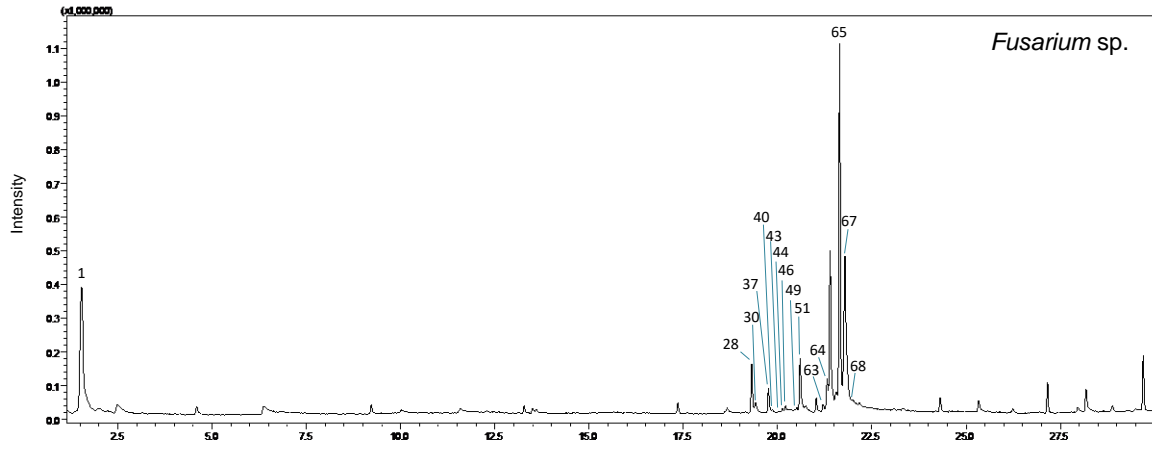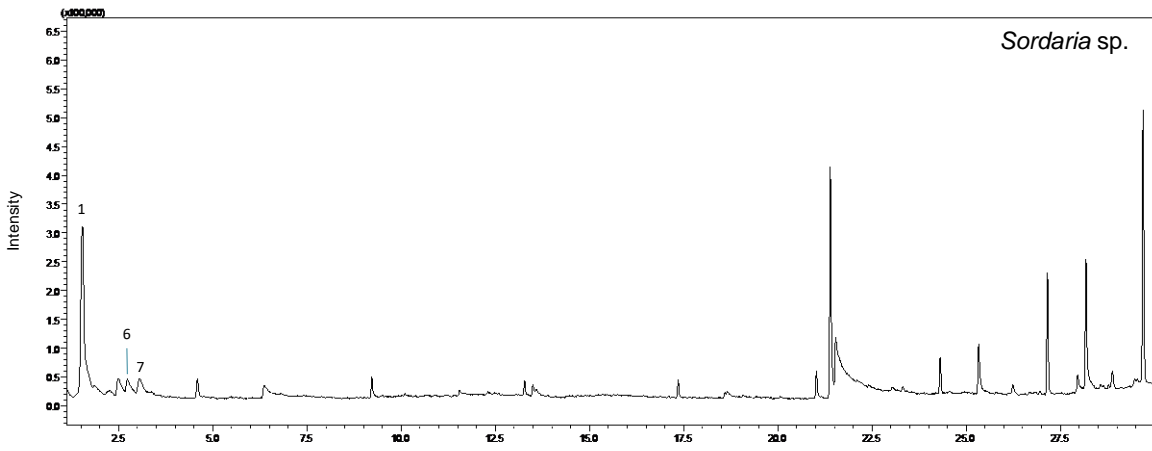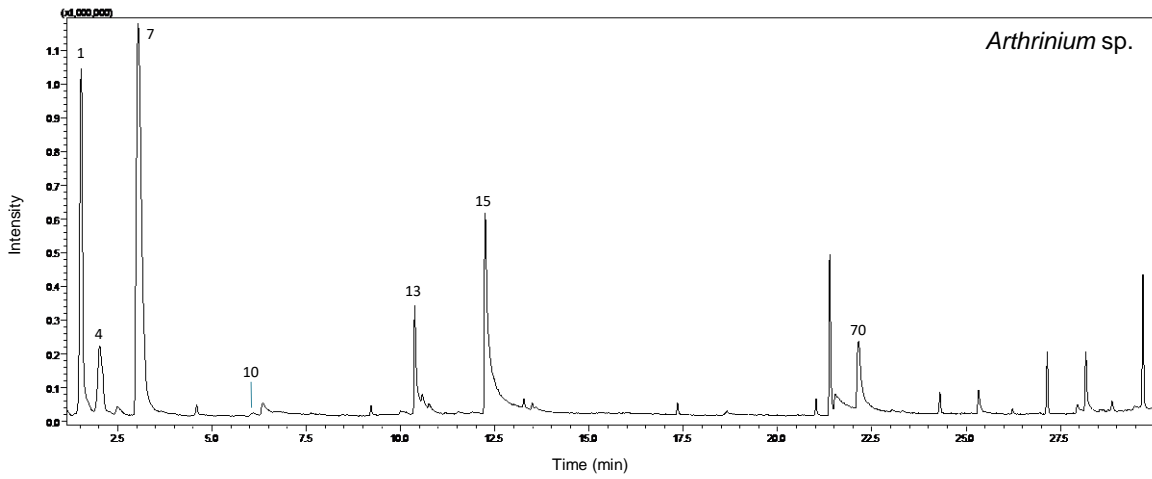

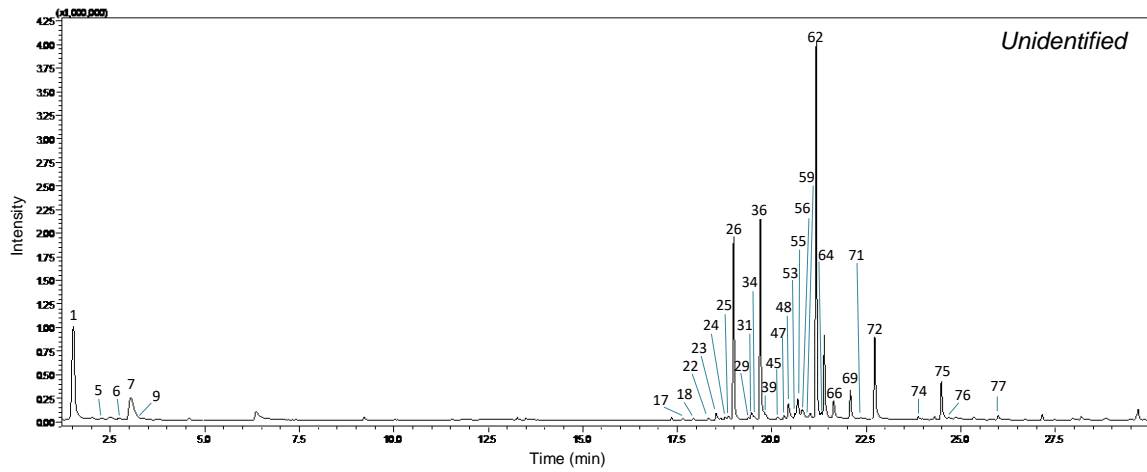

**Figure S1:** Representative total ion chromatogram of volatiles measured from different endophytes used in this study. Numbers indicate different volatile organic compounds, listed in Table S3. Peaks without numbers are either contamination from the PDMS tube or originate from the culture media itself.

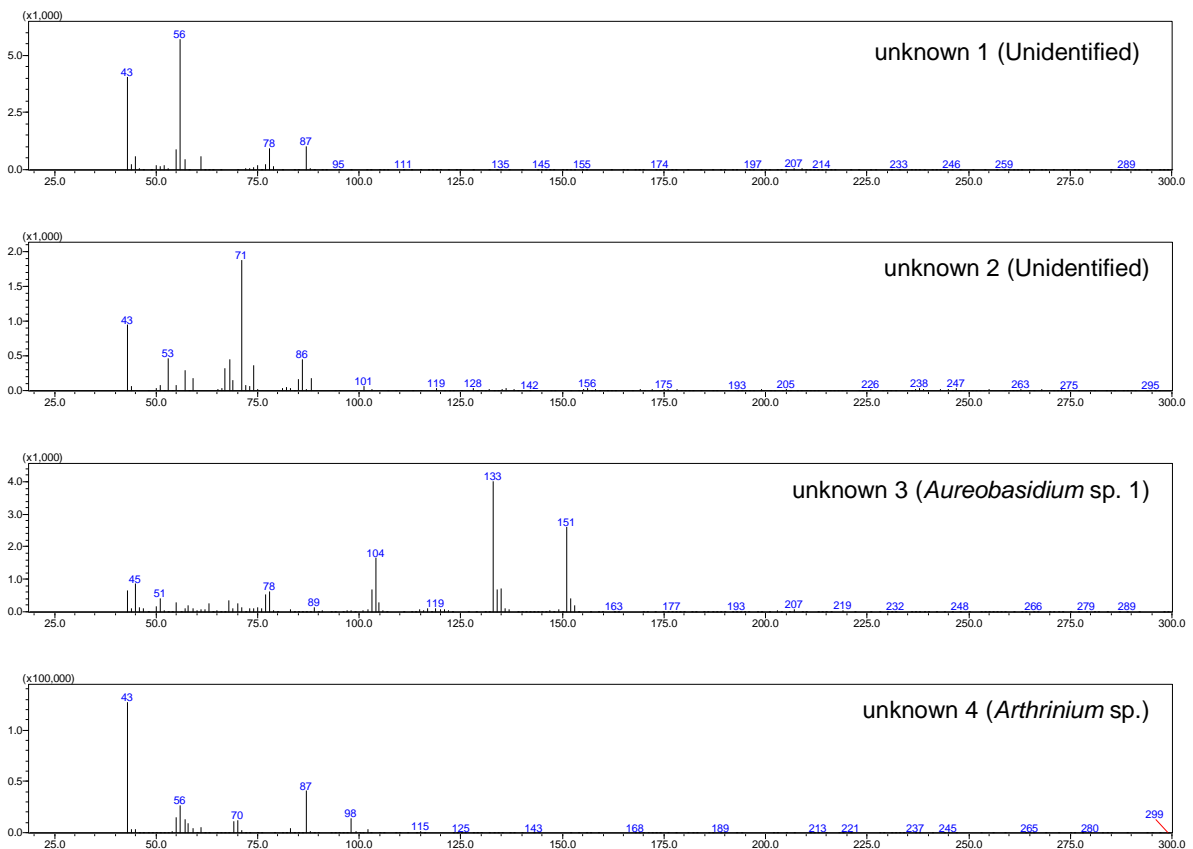

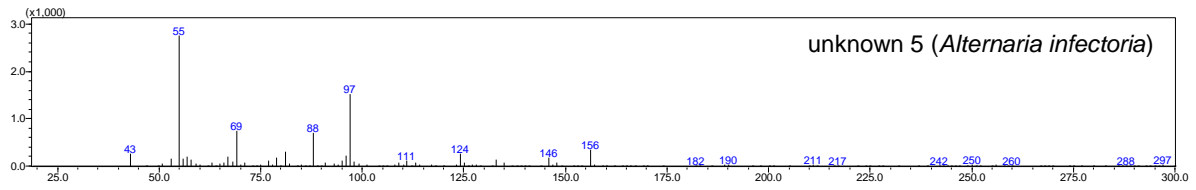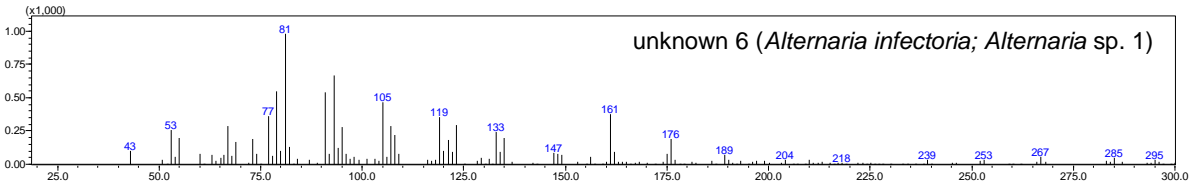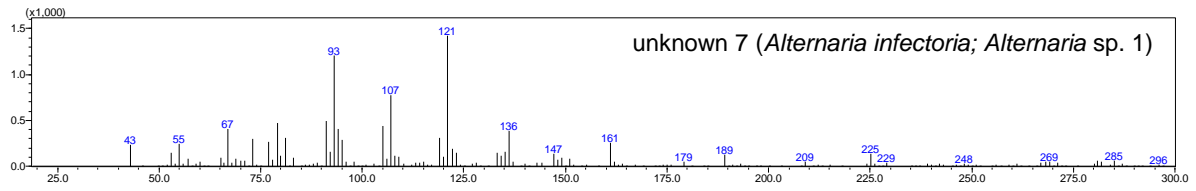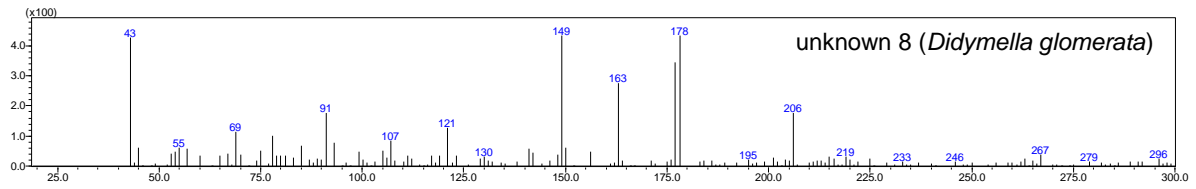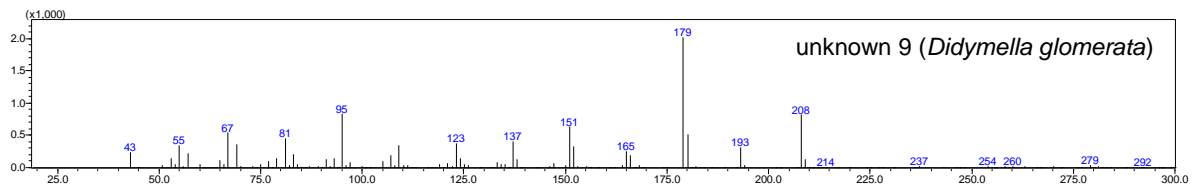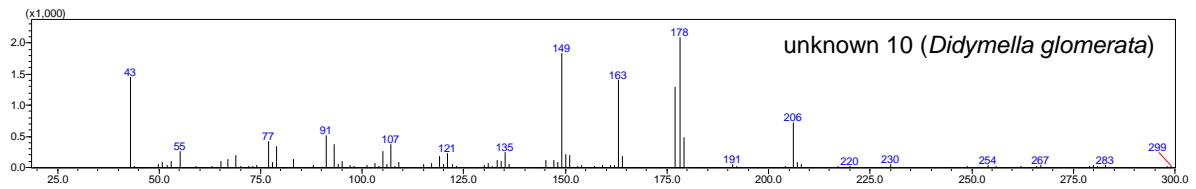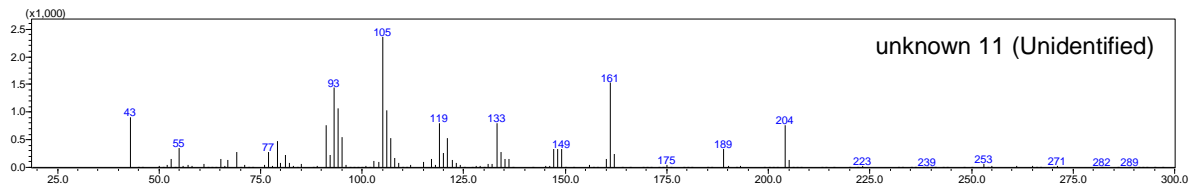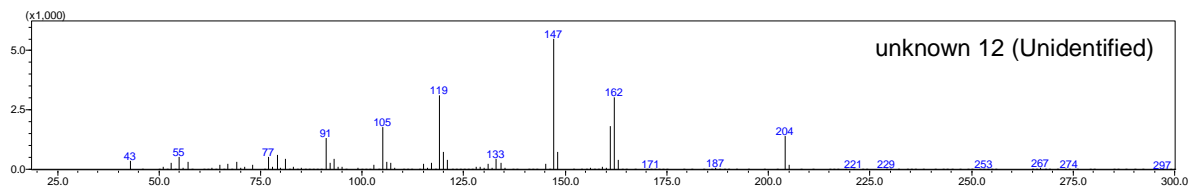

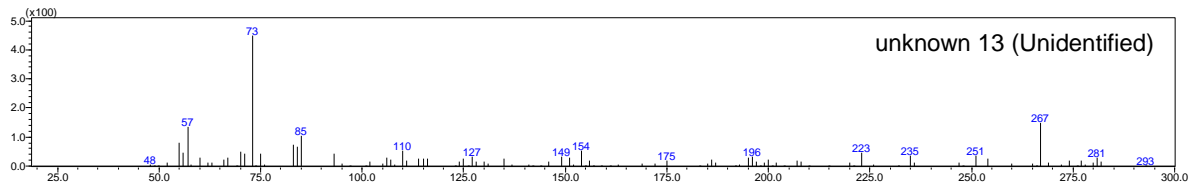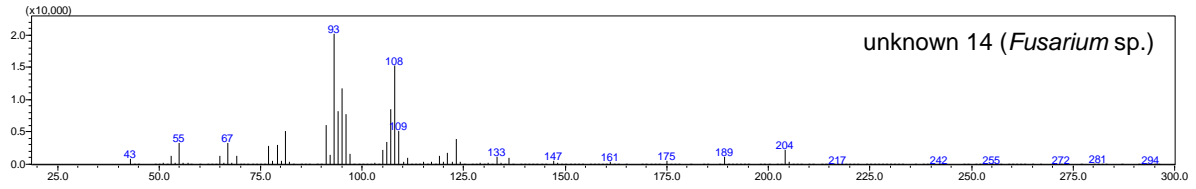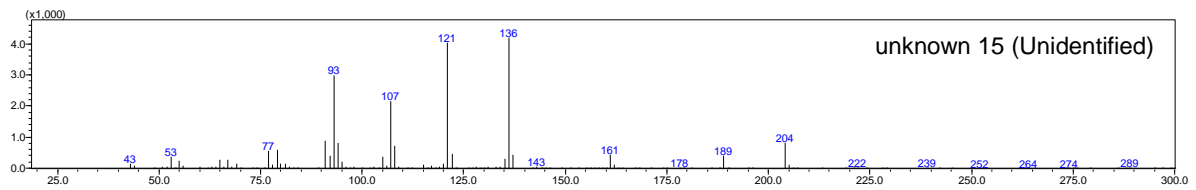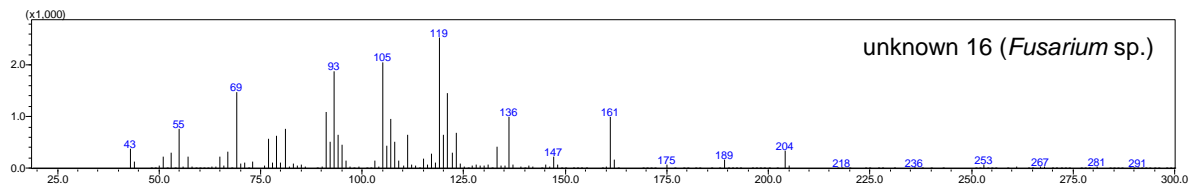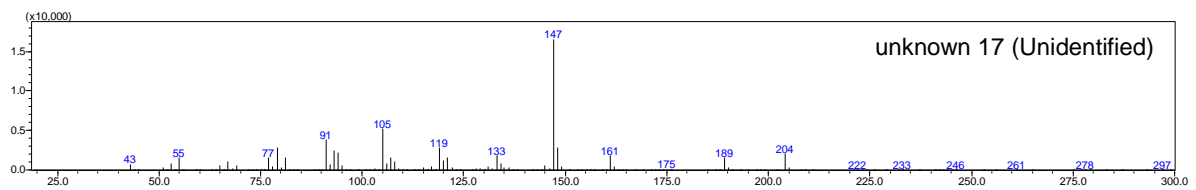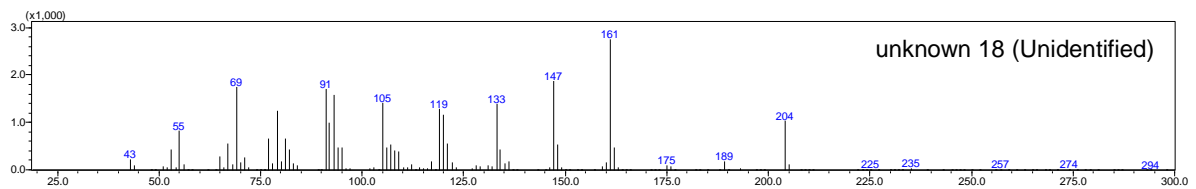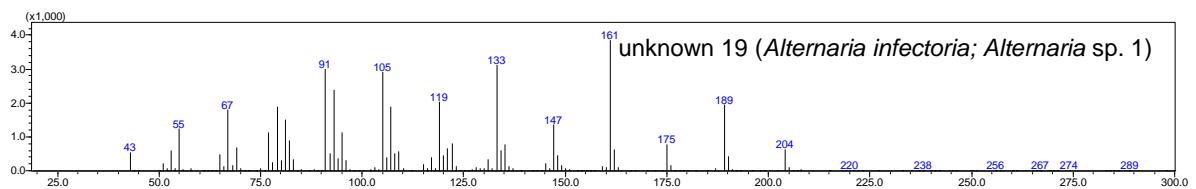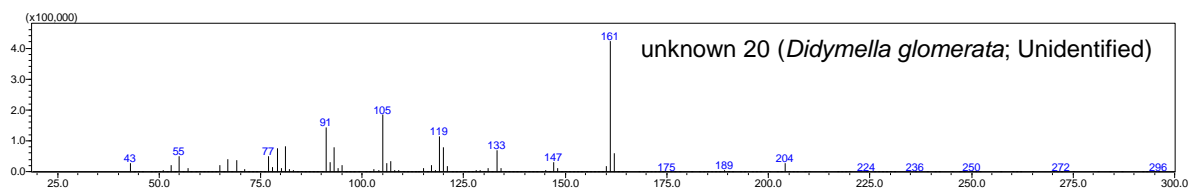

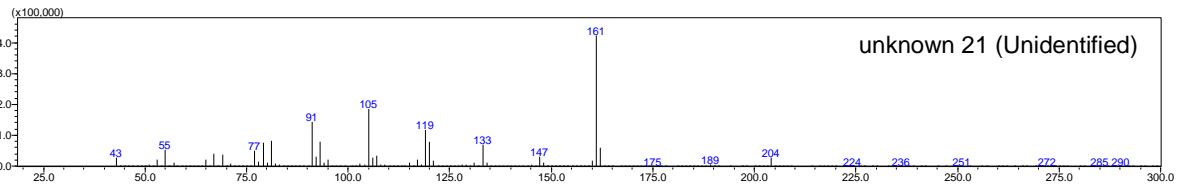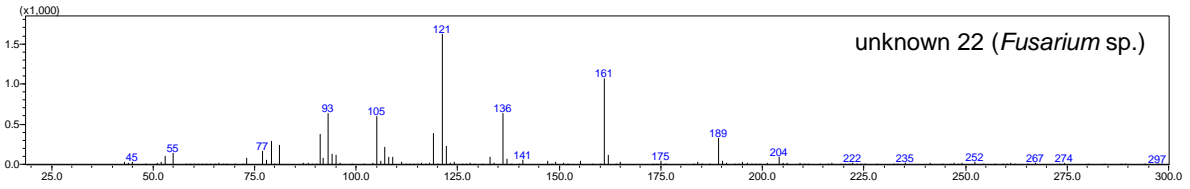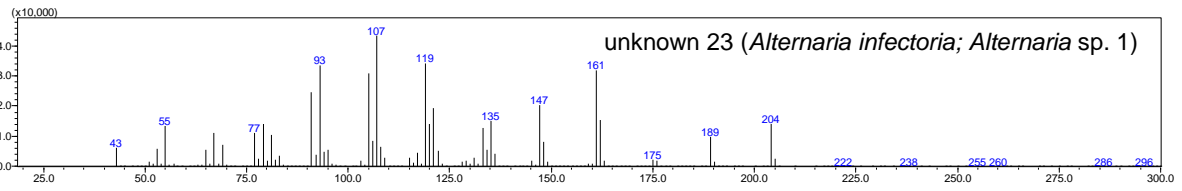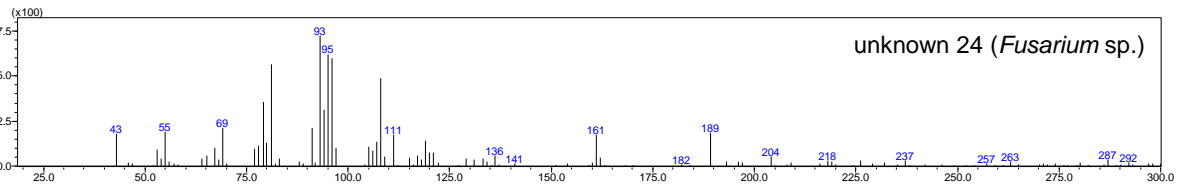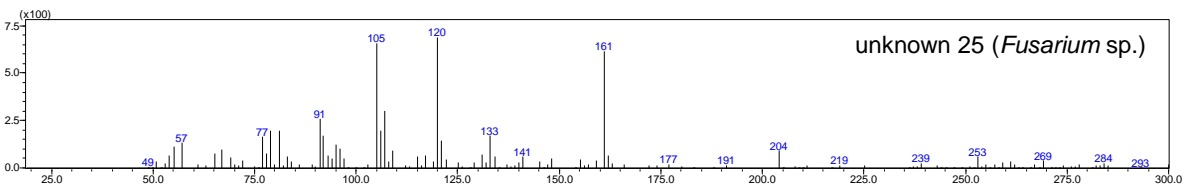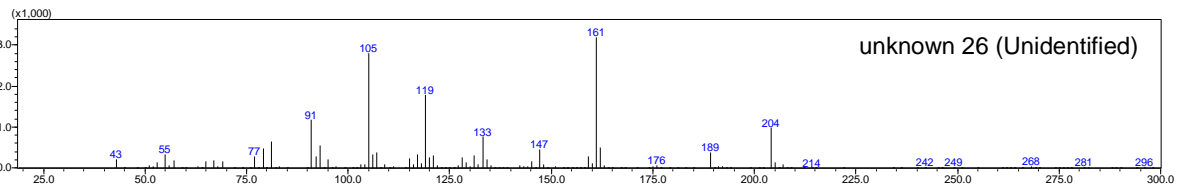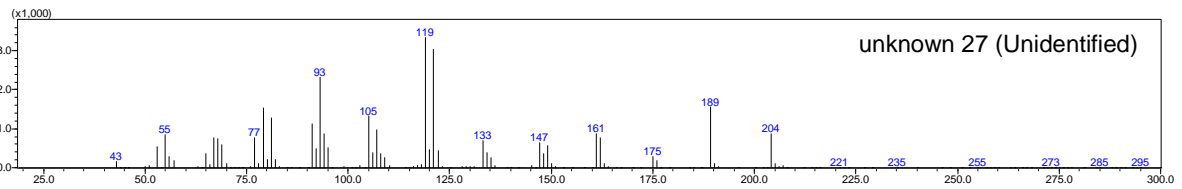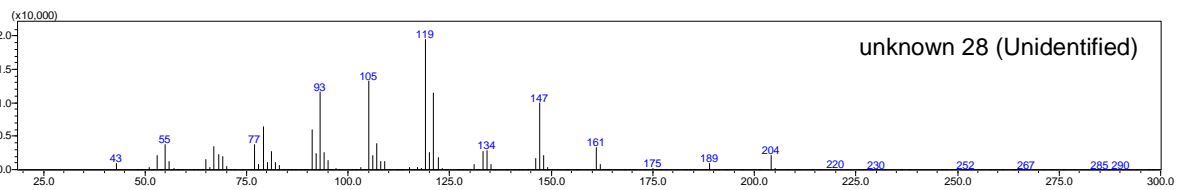

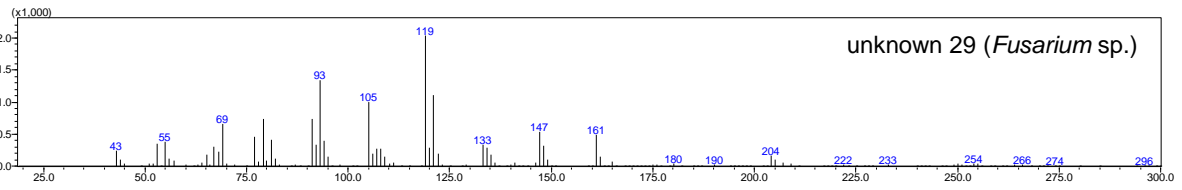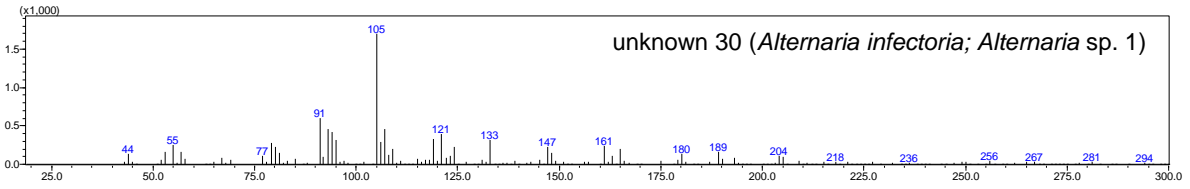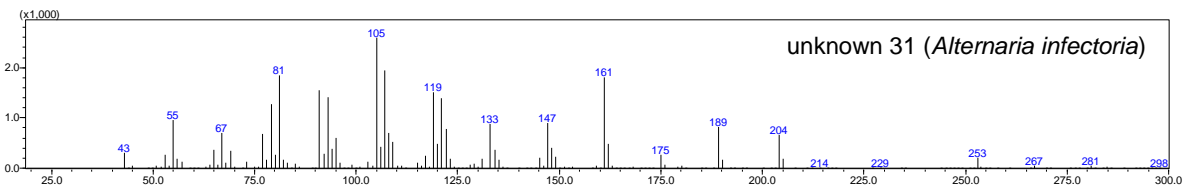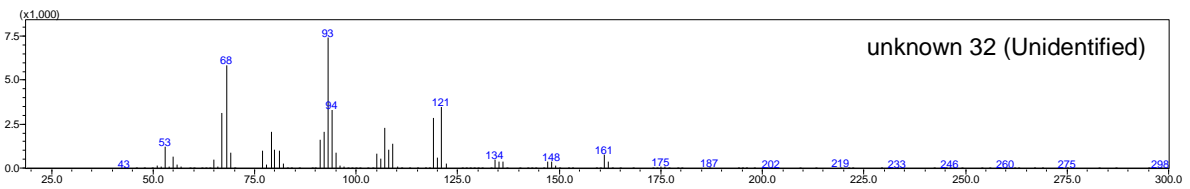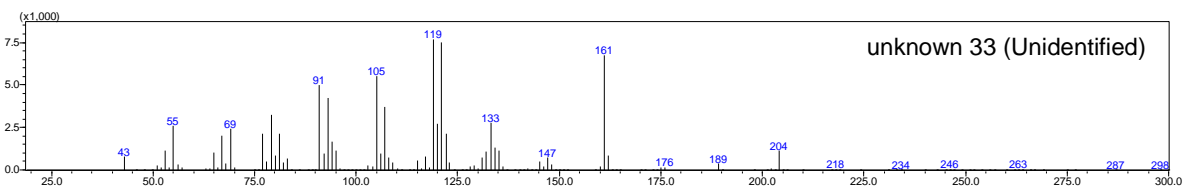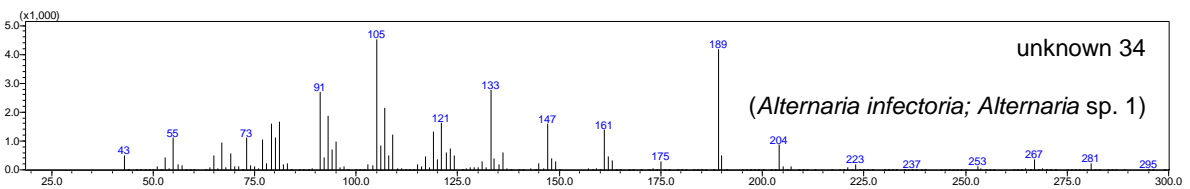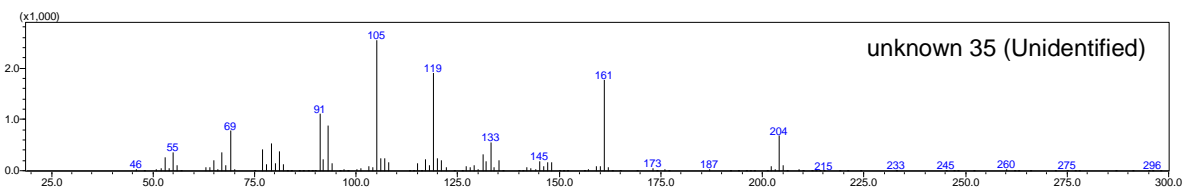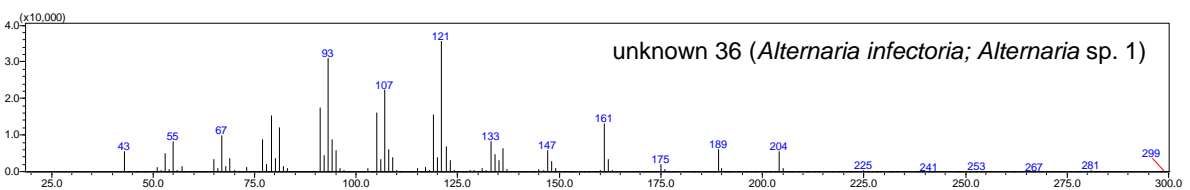

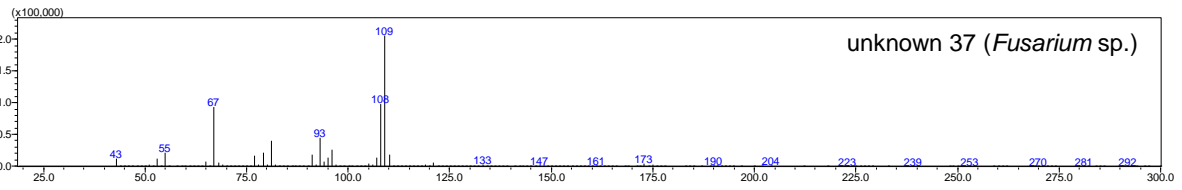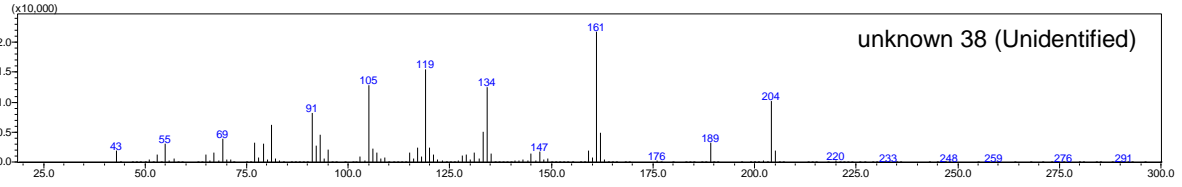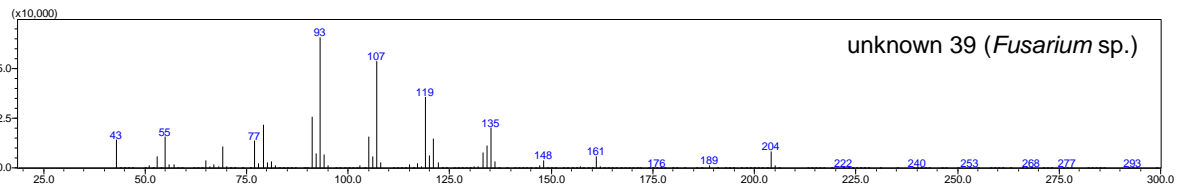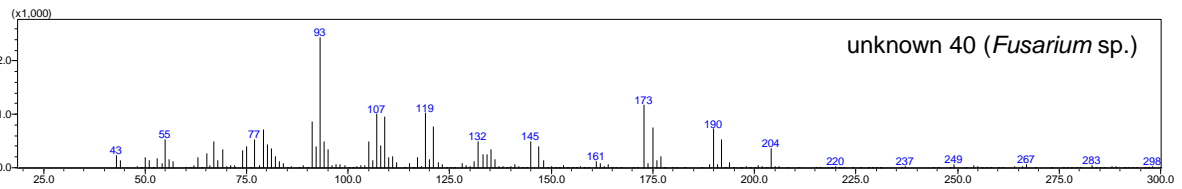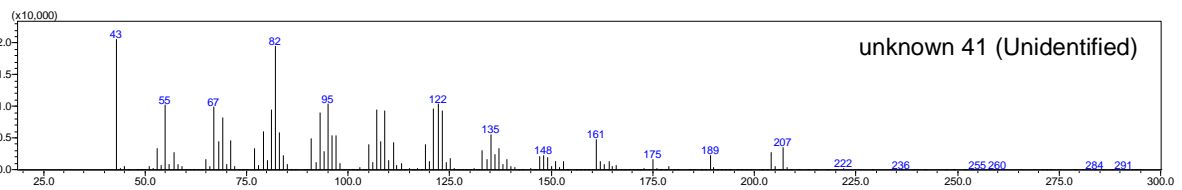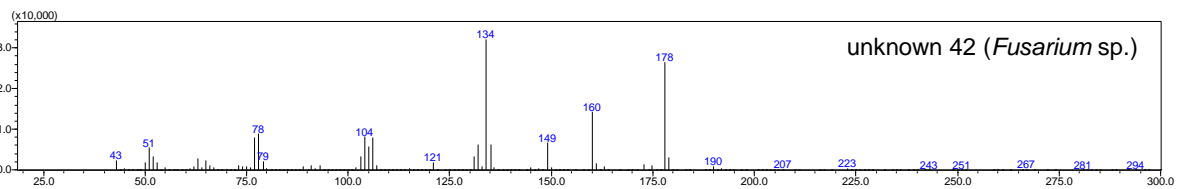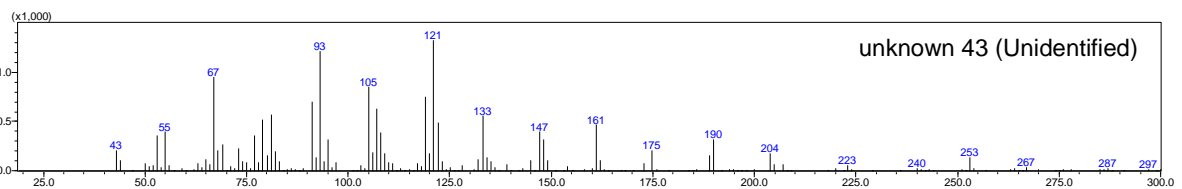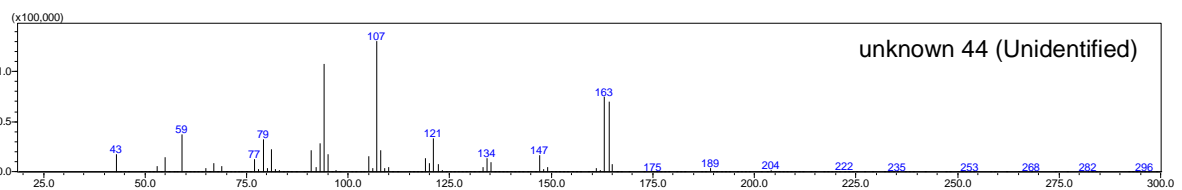



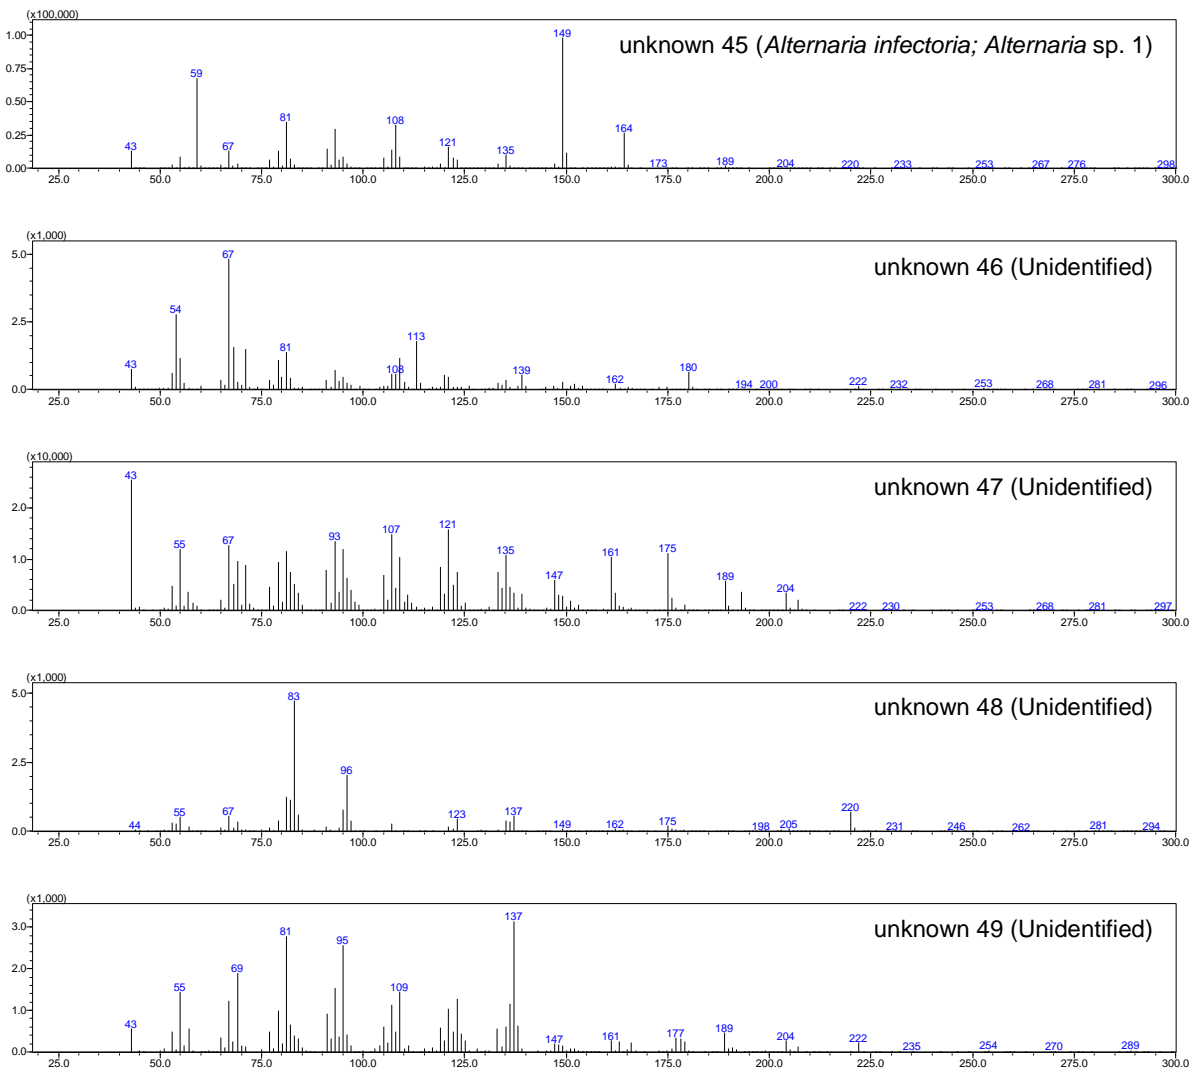

**Figure S2:** Mass spectra of unknown volatile organic compounds shown in Table 2.

Background has been subtracted.

```
# BUSCO version is: 3.0.2
# The lineage dataset is: fungi_odb9 (Creation date: 2016-02-13, number of species: 85, number of
BUSCOs: 290)
# To reproduce this run: python /opt/software/bin/run_BUSCO.py -i /opt/software/packages/galaxy-
dist/database/files/009/dataset_9623.dat -o busco_galaxy -l
/opt/software/packages/busco/lineage/fungi_odb9/ -m transcriptome -c 11 -e 0.01 -z
#
# Summarized benchmarking in BUSCO notation for file /opt/software/packages/galaxy-
dist/database/files/009/dataset_9623.dat
# BUSCO was run in mode: transcriptome
C:98.3%[S:93.1%,D:5.2%],F:1.4%,M:0.3%,n:290
285 Complete BUSCOs (C)
270 Complete and single-copy BUSCOs (S)
15 Complete and duplicated BUSCOs (D)
4 Fragmented BUSCOs (F)
1 Missing BUSCOs (M)
290 Total BUSCO groups searched
```

**Figure S3:** BUSCO analysis of the *Cladosporium* sp. *de novo* assembly. The BUSCO software tool [1] was used to validate the completeness of the *de novo* assembly.

## Reference

1. Afgan, E.; Baker, D.; Batut, B.; Van Den Beek, M.; Bouvier, D.; Čech, M.; Chilton, J.; Clements, D.; Coraor, N.; Grüning, B. A., *Nucleic acids research* **2018**, *46* (W1), W537-W544.
